# Supplementary material
Source: publisher figshare collection journal article supplement (https://tandf.figshare.com/articles/dataset/_/1568779)
Supplement: Supplementary file 1 [file 1]

Video. *Case 1*: High-resolution surgical video through an OPMI Lumera microscope (Carl Zeiss Meditec, Oberkochen, Germany) demonstrating removal of both the dissociated medication reservoir and the dislocated PCIOL. A 25-gauge pars plana approach and disposable end-grabbing forceps (Alcon Laboratories, Fort Worth, TX) were used to transfer both components into the anterior segment after viscoelastic was placed into the anterior chamber to protect the corneal endothelium. Both were removed from the eye via a clear corneal incision.
